# Supplementary material for: The role of European windstorm clustering for extreme seasonal losses as determined from a high resolution climate model
Source: Copernicus journal article supplement (doi:10.5194/nhess-2018-165), 2018-06-18
Supplement: Supplementary file [file nhess-2018-165-AC1-supplement.zip]

# The role of serial European windstorm clustering for extreme seasonal losses as determined from multi-centennial simulations of high resolution global climate model data

Matthew D. K. Priestley, Helen F. Dacre, Len C. Shaffrey, Kevin I. Hodges, Joaquim G. Pinto

## Response to reviewer 1

Dear Reviewer,

We thank you for the comments and suggestions that you have made to our manuscript, which have helped improve its quality. Please find below a response to all of your comments and questions raised. Any page and line numbers refer to the initial NHESD document. The italicised black text are the comments to the manuscript. Our responses are in red with any changes described. An amended version of the manuscript has also been uploaded to highlight the changes. In the marked version, text which has been removed has been struck through, with new additions being in red.

*This paper presents an analysis of temporal clustering of extratropical cyclones in the North Atlantic and the associated windstorm losses over central Europe. The studies shows the seasonally aggregated losses are substantially underestimated if temporal clustering is not taken into consideration. Also the relative contribution of the cyclone resulting in the highest losses per season to the overall seasonal losses is investigated. This contribution is very variable and ranges between 25 to 50%. The study makes use of decadal hindcasts to analyze hundreds of years of present day simulations and statistics based on this large sample are very robust. The quality of the text, the figures and the science is high. The only point that should be scrutinized is the GPD fit to the ERA-interim data. This analysis is not convincing and not necessary to support the main points of the paper.*

### Minor points:

1. Title: Suggest to add that the clustering refers to clustering in time

We have added the word 'serial' and also re-worded the title in accordance with the comments from reviewer 2, comment 1. The title now reads 'The role of serial European windstorm clustering for extreme seasonal losses as determined from multi-centennial simulations of high resolution global climate model data'.

2. P2L7 The most severe seasons in terms of the total windstorm loss

The start of this sentence has been changed from 'The most severe seasons...' to 'The most severe seasons, in terms of total windstorm loss, ...'.

3. P2L31 these events reference unclear

'These events...' has been changed to 'Clustering...' in order to clarify what events are being referred to.

4. *P3L4/5 incomplete sentence*

The words 'spatial coverage' have been added. The sentence start now reads 'With this aim, the historical reanalysis datasets provide a comprehensive spatial coverage...'. This also addresses comment number 11 from reviewer 2.

5. *P3I18 The question is incomplete contributes more than what?*

The question has been rephrased for clarity. It now reads as 'Does windstorm clustering contribute more to losses in Europe for winter seasons with large accumulated losses?'. This is also a point raised by reviewer 2, comment 12.

6. *P5I25 Why is this threshold sensible? Why not set these grid-points to NaN?*

This threshold was chosen based on the results of Karremann (2015). They discuss how wind damage generally occurs for gusts speeds above 21 m/s. This gust speed relates to sustained wind speeds between 8 m/s and 11 m/s. Their analysis then concludes that 9 m/s to be the best minimum threshold for the SSI for all regions across Europe. These grid points are not set to NaN as we want to calculate an SSI values at all European grid-points, therefore setting the threshold to NaN would not allow us to do this.

7. *P6L8 Why a 72 hour threshold?*

The 72-hour threshold is commonly used by re-insurance companies to define the duration of an 'event' (Mitchell-Wallace et al., 2017). This is stated in the text.

8. *P6 L36ff What is the base time for the analysis? Seasons, months?*

The dispersion is calculated using the storm track density in units of storms per month. This value of storms per month is an average for each DJF winter season. The text has been clarified in the text to read 'This relates the variance ( $\sigma^2$ ) in storm track density (average number of storms per month in a single DJF season) to the mean ( $\mu$ ) storm track density'. This has also been changed to be in accordance with comment 20 from reviewer 2.

9. *P7I16 How can this proportion become negative? Should it not be always positive?*

Yes, this should always be positive. This should read that the distinction is in values above or below 1 for over/under dispersive behaviour of storms. This has been changed in the text.

10. *P8L15ff How do you decluster the extremes to use only independent values for the GPD estimate, especially as your time-series are clustered in time. See e.g. Ferro and Segers <https://rss.onlinelibrary.wiley.com/doi/abs/10.1111/1467-9868.00401>*

Independent values are used for the GPD estimate by the definition of the AEP and OEP only taking one value per winter season, therefore making them fully independent from the rest of the data. As the AEP and OEP provide one value per winter season, they are not related to the other seasons and hence all values are independent for the GPD estimations.

11. *P8L15 The GPD fit to ERA-interim seems a bit of a coup de main to me, especially considering that you are bias correcting the data beforehand thereby potentially introducing substantial uncertainty. Also the 70th percentile threshold for the fitting seems to be extremely low. Did you test this threshold? I would recommend fitting the GPD only to the model data, the results are convincing enough (even more convincing) without this analysis.*

The reason why we include this figure was to enable a comparison with the GCM data, and display the advantages of the longer dataset. Still, we agree with the reviewer that the GPD is not convincing and thus does not need to be shown and discussed so prominently. Subsequently, we have decided to split figure 5 up, retaining figure 5a in the main text and move

figure 5b to the supplementary material. This has been done for the purpose of continuity in the text with some minor changes made to reflect this. Some of the details regarding the visual details of figure 5b (now figure A2) have been removed from the text to improve the readability of this section. We decided against removing figure 5b altogether from the paper to keep consistency. Moreover, threshold for fitting the GPD to the ERA-Interim data was tested, and using a threshold consistent with that applied to HiGEM (90<sup>th</sup> percentile) did not result in a good fit due to the very small data sample. We have thus kept the threshold for figure A2 (old 5b)

*12. P8L27 well please quantify*

The wording has been changed slightly to now read 'agree...' as opposed to the original 'contrast well...' to remove the value judgement. In addition a quantification of the agreement has been added 'agree (anomalies within  $\pm 2$  cyclones per month)'. This is also in agreement with comment 24 from reviewer 2.

*13. P9L19 Please define clustering for the readers not familiar with Priestley et al 2017*

This is discussed in the introduction (paragraph 3) with a definition of clustering provided and the key findings of the Priestley et al. (2017) paper are given. A further quantification has been added to the start of this paragraph that this is '(as discussed in section 1)'.

*14. P9L30 slight please quantify*

This has been clarified in the text. It now reads 'albeit with a lower frequency of anticyclone RWB on the southern flank of the jet'.

*15. P10L18 "this is balanced" be very careful, as soon as the exposure comes into play, the exact location matters a lot and you might introduce substantial artefacts. Are your results qualitatively independent from this bias correction?*

We have slightly rephrased the sentence to remove ambiguity, It now reads 'the difference have changed sign and are now positive, there are also some regions that still have negative anomalies, resulting...'. Due to the bias correction being a uniform scaling to the wind data only, all the results examining the SSI are independent from the bias correction. Figure 1 shown at the end of the responses is a version of figure 7 in the main article with no scaling applied, and also no population weighting. You can see how the results are qualitatively very similar to those presented in the article with an average value of AEP/AEP\_random of approximately 1.2 at a return period of 200 years.

*16. P11L24 increase between what and what?*

This is to illustrate the increase in the largest AEP and OEP from ERA-Interim to HiGEM. To improve clarity the text has been reworded to 'For example, the 918 year return period season in HiGEM is approximately twice the magnitude of the 1 in 36 year season in ERA-Interim.'. This change is also in accordance with comment 31 from reviewer 2.

*17. P11L33 marginally lower as would be expected... -> I do not understand this sentence*

As we are removing a large portion of the events (i.e. setting small events to have a magnitude of 0) that make up each season this results in a reduction of the AEP value compared to when including the full number of events. The sentence has been slightly changed to aid clarification to 'The magnitudes of the reduced event AEPs are marginally lower than the original AEPs, as would be expected...'.

*18. P13L2 the 3 year*

This has been changed in the text to 'above a return period of 3 years...'.

19. P14l1 suggest: the importance of temporal clustering on seasonal timescales

We have changed the sentence to 'The aim of this study is to investigate the importance of serial clustering on seasonal timescales for high...'.

20. P14l28ff This sentence is unclear

We have removed the sentence 'The absolute difference between the AEP and OEP is increasing with return period.' In order to improve the clarity and readability of this conclusion.

21. Figure 4: what are the units of SSI? What happens in the eastern Mediterranean?

There are no units to the SSI. ( $V/V_{98}$ ) would be unitless. In addition the population density was normalised in order to reduce the magnitude of the final loss value. Therefore the SSI value is just a magnitude of event or seasonal loss which can be compared with the other events/seasons. With regards to the high SSI values in the eastern Mediterranean, we have found that these grid points have a very long tail in the 10-metre wind speeds compared to all of northern and northwestern Europe (7-8 m/s across E. Med., compared to 6-7m/s across NW Europe). This long tail means that high SSI values will be generated in this region. However, this is not a region for which the SSI is suitable (it is stated in the text that it is a 'loss proxy for European windstorms'), therefore these spurious values can be ignored and are not considered in our analysis.

22. Figure 5a: Please add units

Please see above comment regarding the units of the SSI.

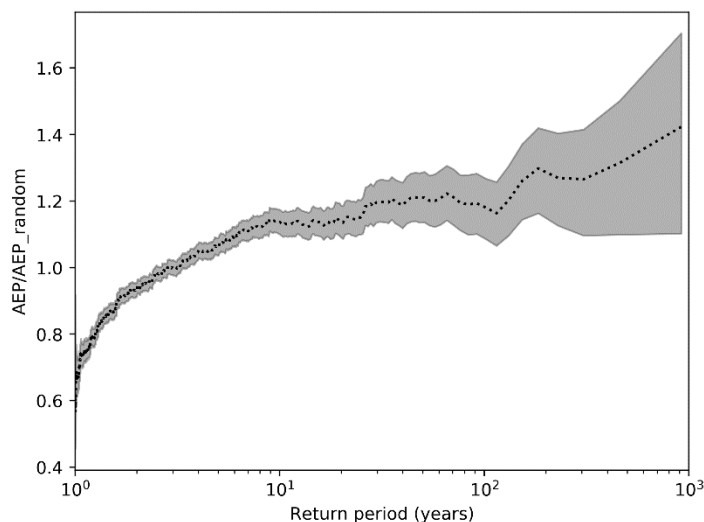

Figure 1. As figure 7 in Priestley et al. (2018), but with no bias correction applied to the 10-metre wind speeds. No population density scaling has been applied either.

## References

Karremann, M. K.: Return periods and clustering of potential losses associated with European windstorms in a changing climate, Ph.D. thesis, Universität zu Köln, 2015.

Mitchell-Wallace, K., Jones, M., Hilier, J., and Foote, M.: Natural Catastrophe Risk Management and Modelling: A Practitioners Guide, 2017.

Priestley, M. D. K., Pinto, J. G., Dacre, H. F., and Shaffrey, L. C.: Rossby wave breaking, the upper level jet, and serial clustering of extratropical cyclones in western Europe, *Geophysical Research Letters*, 44, 514–521, <https://doi.org/10.1002/2016GL071277>, <http://dx.doi.org/10.1002/2016GL071277>, 2017.
